# Supplementary material for: Antibiotic and Heavy Metal Susceptibility of Non-Cholera Vibrio Isolated from Marine Sponges and Sea Urchins: Could They Pose a Potential Risk to Public Health?
Source: MDPI journal article supplement (doi:10.3390/antibiotics10121561), 2021-12-20
Supplement: s1 [file s1]

# Supplementary Materials

## Antibiotic and heavy metal susceptibility of non-cholera *Vibrio* isolated from marine sponges and sea urchins: could they pose a potential risk to public health?

Wellington Felipe Costa, Marcia Giambiagi de-Marval, Marinella Silva Laport \*

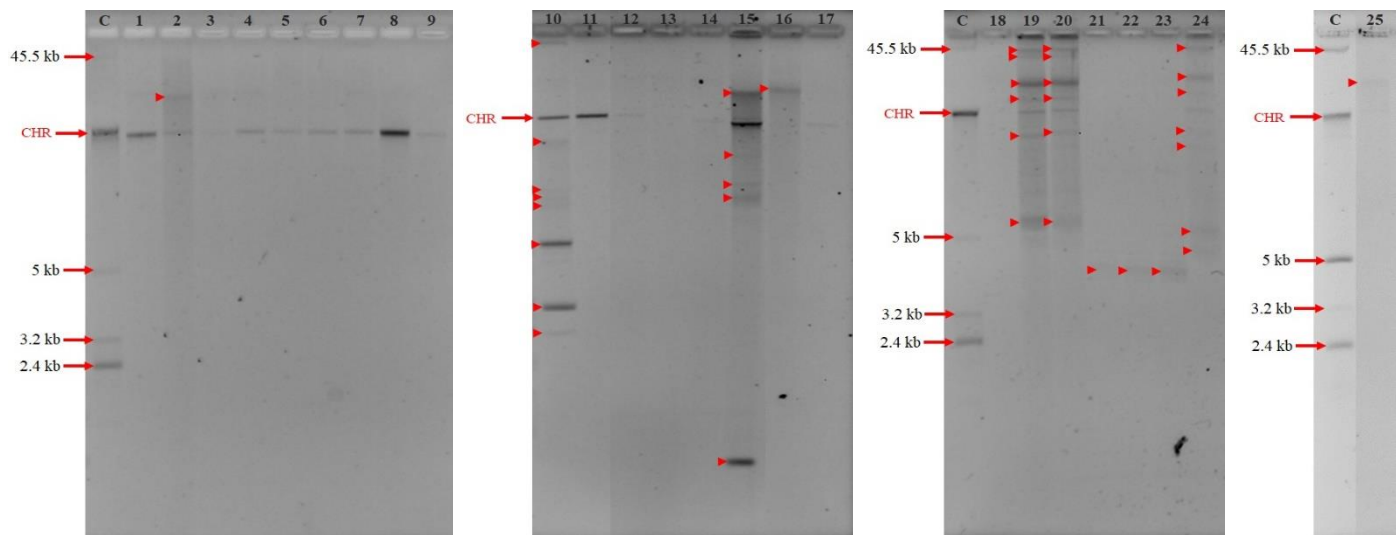

**Figure S1.** Plasmid profile of the *Vibrio* spp. strains. Plasmid DNA analyzed by 0.8% agarose gel electrophoresis. Lanes C: *K. pneumoniae* Kp13 (molecular size plasmids control); 1: 51BHI25; 2: 51BHI28; 3: 84BHI7b; 4: 51BHI31; 5: 51BHI31a; 6: 64BHI6; 7: 64BHI7; 8: 84BHI4; 9: 84BHI5; 10: 51BHI30; 11: 84BHI6; 12: 84BHI10; 13: 84B1:104; 14: 84MA3; 15: 84MA4; 16: HIM15.10<sup>-3</sup>; 17: HEM9.10<sup>-3</sup>; 18: ME7; 19: P1I-2; 20: P1I-8; 21: P3I-9; 22: P3I-12; 23: P3I-23; 24: P5I-6; 25: 84BHI7a. Fragmented chromosomal (CHR) and plasmid DNAs are indicated by arrows and arrow heads, on the left side.

**Table S1.** Identification, antimicrobial resistance profile, antimicrobial and heavy metal resistance genes, virulence genes and the plasmid profile of *Vibrio* spp. isolates from marine sponges (Brazil) and sea urchins (France).

| Host                                    | Strain                                 | Accession Number <sup>a</sup> | BLASTn (%; Accession Number) <sup>b</sup>       | MALDI-TOF identification (score)    | Phenotypic Resistance      | Resistance genes | Virulence genes | Plasmids <sup>c</sup> |
|-----------------------------------------|----------------------------------------|-------------------------------|-------------------------------------------------|-------------------------------------|----------------------------|------------------|-----------------|-----------------------|
| <i>Darwinella</i> sp. 1 (marine sponge) | <i>Vibrio</i> sp. 51BHI25              | KX148503                      | <i>Vibrio alginolyticus</i> (99.34; MH643615.1) | <i>Vibrio alginolyticus</i> (2.169) | CFE                        | -                | -               | -                     |
|                                         | <i>Vibrio</i> sp. 51BHI28 <sup>d</sup> | KX148504                      | <i>Vibrio alginolyticus</i> (99.10; MK988029.1) | <i>Vibrio alginolyticus</i> (1.758) | AMI, CFE, SXT <sup>i</sup> | -                | -               | 1                     |
|                                         | <i>Vibrio</i> sp. 51BHI30              | KX148505                      | <i>Vibrio alginolyticus</i> (99.87; AP022865.1) | <i>Vibrio alginolyticus</i> (2.068) | -                          | -                | -               | 8                     |

|                                                          |                                          |          |                                                                 |                                                             |                                                                                      |                           |   |   |
|----------------------------------------------------------|------------------------------------------|----------|-----------------------------------------------------------------|-------------------------------------------------------------|--------------------------------------------------------------------------------------|---------------------------|---|---|
|                                                          | <i>Vibrio</i> sp.<br>51BHI31             | KX148506 | <i>Vibrio</i><br><i>alginolyticus</i><br>(99.60;<br>MK988029.1) | <i>Vibrio</i><br><i>alginolyticus</i><br>(2.046)            | AMC <sup>i</sup> , CFE,<br>SXT <sup>i</sup>                                          | -                         | - | - |
|                                                          | <i>Vibrio</i> sp.<br>51BHI31a            | KX148507 | <i>Vibrio</i><br><i>alginolyticus</i><br>(99.60;<br>MK988029.1) | <i>Vibrio</i><br><i>alginolyticus</i><br>(1.803)            | CFE, ERY                                                                             | -                         | - | - |
| <i>Plakina</i><br><i>cyanorosa</i><br>(marine<br>sponge) | <i>Vibrio</i> sp.<br>64BHI6              | KX148484 | <i>Vibrio</i><br><i>alginolyticus</i><br>(97.09;<br>MK988029.1) | <i>Vibrio</i><br><i>alginolyticus</i><br>(2.169)            | -                                                                                    | -                         | - | - |
|                                                          | <i>Vibrio</i> sp.<br>64BHI7              | KX148485 | <i>Vibrio</i><br><i>alginolyticus</i><br>(98.94;<br>MK102585.1) | <i>Vibrio</i><br><i>alginolyticus</i><br>(2.054)            | CFE                                                                                  | -                         | - | - |
| <i>Darwinella</i><br>sp. 2<br>(marine<br>sponge)         | <i>Vibrio</i> sp.<br>84BHI4              | KX148486 | <i>Vibrio</i><br><i>alginolyticus</i><br>(98.50;<br>MK452731.1) | <i>Vibrio</i><br><i>alginolyticus</i><br>(2.165)            | CFO <sup>i</sup> , OFX <sup>i</sup>                                                  | -                         | - | - |
|                                                          | <i>Vibrio</i> sp.<br>84BHI5              | KX148487 | <i>Vibrio</i><br><i>alginolyticus</i><br>(98.62;<br>MH368400.1) | <i>Vibrio</i><br><i>alginolyticus</i><br>(1.744)            | CFE                                                                                  | -                         | - | - |
|                                                          | <i>Vibrio</i> sp.<br>84BHI6 <sup>d</sup> | KX148488 | <i>Vibrio</i><br><i>alginolyticus</i><br>(97.73;<br>MH368400.1) | <i>Vibrio</i><br><i>alginolyticus</i><br>(1.803)            | APS <sup>i</sup> , CIP <sup>i</sup> ,<br>ERY                                         | -                         | - | - |
|                                                          | <i>Vibrio</i> sp.<br>84BHI7a             | MH404096 | <i>Vibrio</i><br><i>proteolyticus</i><br>(94.39;<br>GQ131641.1) | <i>Vibrio</i><br><i>parahaemolyt</i><br><i>icus</i> (2.012) | CFE                                                                                  | -                         | - | 1 |
|                                                          | <i>Vibrio</i> sp.<br>84BHI7b             | MH404095 | <i>Vibrio azureus</i><br>(99.42;<br>JQ665317.1)                 | <i>Vibrio mytili</i><br>(1.95)                              | AMI <sup>i</sup> , CFE                                                               | -                         | - | - |
|                                                          | <i>Vibrio</i> sp.<br>84BHI10             | KX148490 | <i>Vibrio</i><br><i>alginolyticus</i><br>(98.90;<br>MN733131.1) | <i>Vibrio</i><br><i>alginolyticus</i><br>(2.283)            | APS <sup>i</sup> , ERY                                                               | <i>bla</i> <sup>SHV</sup> | - | - |
|                                                          | <i>Vibrio</i> sp.<br>84B1:104            | KX148492 | <i>Vibrio</i><br><i>alginolyticus</i><br>(98.17;<br>MH368400.1) | <i>Vibrio</i><br><i>alginolyticus</i><br>(2.061)            | ERY                                                                                  | -                         | - | - |
|                                                          | <i>Vibrio</i> sp.<br>84MA3               | MF919340 | <i>Vibrio</i><br><i>alginolyticus</i><br>(99.17;<br>MK988029.1) | <i>Vibrio</i><br><i>alginolyticus</i><br>(2.133)            | -                                                                                    | -                         | - | - |
|                                                          | <i>Vibrio</i> sp.<br>84MA4               | MF919341 | <i>Vibrio</i><br><i>alginolyticus</i><br>(99.32;<br>MN733127.1) | <i>Vibrio</i><br><i>alginolyticus</i><br>(1.968)            | AMI <sup>h</sup> , APS <sup>i</sup> ,<br>CFE, GEN <sup>h</sup> ,<br>TOB <sup>h</sup> | -                         | - | 5 |

|                                                 |                                              |          |                                                          |                                        |     |             |            |   |
|-------------------------------------------------|----------------------------------------------|----------|----------------------------------------------------------|----------------------------------------|-----|-------------|------------|---|
|                                                 | <i>Vibrio</i> sp. HIM<br>15.10 <sup>-3</sup> | MG561916 | <i>Vibrio harveyi</i><br>(100;<br>CP035693.1)            | <i>Vibrio harveyi</i><br>(2.254)       | ERY | -           | -          | 1 |
| <i>Haliclona</i><br>sp.<br>(marine<br>sponge)   | <i>Vibrio</i> sp. HEM<br>9.10 <sup>-3</sup>  | MH404093 | <i>Vibrio neocaledonicus</i><br>(94.71;<br>KX037098.1)   | <i>Vibrio parahaemolyticus</i> (1.910) | ERY | -           | -          | - |
|                                                 | <i>Vibrio</i> sp. ME7                        | MH404094 | <i>Vibrio coralliilyticus</i><br>(94.45;<br>MH613238.1)  | <i>Vibrio harveyi</i><br>(2.179)       | ERY | -           | <i>vvh</i> | - |
|                                                 | <i>Vibrio</i> sp. P1I-2                      | KX898819 | <i>Vibrio oceanisediminis</i><br>(98.29;<br>NR_137371.1) | not reliable<br>identification (1.438) | -   | <i>cusB</i> | -          | 6 |
|                                                 | Vibrionales P1I-8                            | KX898821 | <i>Vibrio oceanisediminis</i><br>(99.26;<br>NR_137371.1) | not reliable<br>identification (1.425) | -   | -           | -          | 6 |
| <i>Paracentrotus lividus</i><br>(sea<br>urchin) | <i>Vibrio</i> sp. P3I-9                      | KX898836 | <i>Vibrio cyclitrophicus</i><br>(92.37;<br>MK102602.1)   | not reliable<br>identification (1.323) | -   | -           | -          | 1 |
|                                                 | Vibrionaceae<br>P3I-12                       | KX898830 | <i>Vibrio gigantis</i><br>(98.47;<br>MH712999.1)         | not reliable<br>identification (1.242) | -   | -           | -          | 1 |
|                                                 | <i>Vibrio</i> sp. P3I-23                     | KX898833 | <i>Vibrio ichthyenteri</i><br>(97.04;<br>NR_117888.1)    | not reliable<br>identification (1.37)  | -   | -           | -          | 1 |
|                                                 | Vibrionales P5I-6                            | KX898861 | <i>Vibrio oceanisediminis</i><br>(99.26;<br>NR_137371.1) | not reliable<br>identification (1.55)  | -   | -           | -          | 7 |

(<sup>a</sup>) GenBank accession numbers of *Vibrio* spp.' 16S rRNA sequences; (<sup>b</sup>) Strains isolation and 16S rRNA identification performed by Freitas-Silva et al. (2020) and Laport et al. (2018) studies; (<sup>c</sup>) number of plasmid forms; (<sup>d</sup>) multidrug-resistant *Vibrio* spp. strain; (<sup>e</sup>) intermediate; (<sup>f</sup>) heteroresistance; (-) negative test; AMC: amoxicillin-clavulanic acid; AMI: amikacin; APS: ampicillin-sulbactam; CFE: cephalixin; CFO: cefoxitin; CIP: ciprofloxacin; ERY: erythromycin; GEN: gentamicin; OFX: ofloxacin; SXT: trimethoprim/sulfamethoxazole; TOB: tobramycin.

**Table S2.** Primers used in this study.

| Primer        | Target                    | Sequence of Primers (5'-3')  | Size (bp) | References |
|---------------|---------------------------|------------------------------|-----------|------------|
|               | <u>β-lactams</u>          |                              |           |            |
| MTEMF         | <i>bla</i> <sub>TEM</sub> | 5'-CCCTTATTCCCTTTTGTGCGG-3'* | 650       | [36]       |
| MTEMR         |                           | 5'-AACCAGCCAGCCWGAAGG-3'*    |           |            |
| MSHVF         | <i>bla</i> <sub>SHV</sub> | 5'-CTTGACCGCTGGGAAACGG-3'    | 200       |            |
| MSHVR         |                           | 5'-AGCACGGAGCGGATCAACGG-3'   |           |            |
| MGESF         | <i>bla</i> <sub>GES</sub> | 5'-AGCAGCTCAGATCGGTGTTG-3'   | 750       |            |
| MGESR         |                           | 5'-CCGTGCTCAGGATGAGTTG-3'    |           |            |
|               | <u>aminoglycosi</u>       |                              |           |            |
|               | <u>des</u>                |                              |           |            |
| aac6-aph2a fw |                           | 5'-GCCAGAACATGAATTACACGAG-3' | 611       | [37]       |

|                        |                              |                                |      |      |
|------------------------|------------------------------|--------------------------------|------|------|
| aac6-aph2a rev         | <i>aac(6')-Ie-aph(2')-Ia</i> | 5'-CTGTTGTTGCATTTAGTCTTTCC-3'  |      |      |
| maac6-IbF              |                              | 5'-TTGCGATGCTCTATGAGTGGCTA-3'  | 482  | [38] |
| maac6-IbR              | <i>aac(6')-Ib</i>            | 5'-CTCGAATGCCTGGCGTGTTC-3'     |      |      |
| Fant                   |                              | 5'-TGGGCGATCGATGCACGGCTRG-3'*  |      |      |
| Rant                   | <i>ant(2'')-I</i>            | 5'-AAAGCGGCACGCAAGACCTCMAC-3'* | 428  | [39] |
| <u>macrolides</u>      |                              |                                |      |      |
| MefC-F                 |                              | 5'-ATGGAAAACCGTAAATGGTT-3'     | 885  | [40] |
| MefC-R                 | <i>mef(C)</i>                | 5'-TTAAATATTTTGTATTTTAC-3'     |      |      |
| MphG-F                 |                              | 5'-ATGAAAAATAGAGATATTCA-3'     | 1224 | [40] |
| MphG-R                 | <i>mph(G)</i>                | 5'-CTACTCAACACCTAACTGTA-3'     |      |      |
| ermB-1                 |                              | 5'-CATTTAACGACGAAACTGGC-3'     | 425  | [41] |
| ermB-2                 | <i>ermB</i>                  | 5'-GGAACATCTGTGGTATGGCG-3'     |      |      |
| ereA-1                 |                              | 5'-AACACCCTGAACCCAAGGGACG-3'   | 420  | [42] |
| ereA-2                 | <i>ereA</i>                  | 5'-CTTCACATCCGGATTTCGCTCGA-3'  |      |      |
| mphA-1                 |                              | 5'-AACTGTACGCACTTGC-3'         | 837  | [42] |
| mphA-2                 | <i>mphA</i>                  | 5'-GGTACTCTTCGTTACC-3'         |      |      |
| MF4a                   |                              | 5'-ACCGATTCTATCAGCAAAG-3'      | 940  | [43] |
| MF6                    | <i>mefA</i>                  | 5'-GGACCTGCCATTGGTGTG-3'       |      |      |
| <u>quinolones</u>      |                              |                                |      |      |
| QnrAm-F                |                              | 5'-AGAGGATTTCTCACGCCAGG-3'     | 580  |      |
| QnrAm-R                | <i>qnrA</i>                  | 5'-TGCCAGGCACAGATCTTGAC-3'     |      |      |
| QnrBm-F                |                              | 5'-GGMATHGAAATTCGCCACTG-3'*    | 264  |      |
| QnrBm-R                | <i>qnrB</i>                  | 5'-TTTGCGYGYCGCCAGTCGAA-3'*    |      |      |
| QnrCm-F                |                              | 5'-GCGAATTTCGAAGGGGCAAA-3'     | 135  |      |
| QnrCm-R                | <i>qnrC</i>                  | 5'-ACCCGTAATGTAAGCAGAGCAA-3'   |      | [44] |
| QnrDm-F                |                              | 5'-AGGTGTAGCATGTATGGAAAAGC-3'  | 691  |      |
| QnrDm-R                | <i>qnrD</i>                  | 5'-ACATTGGGGCATTAGGCGTT-3'     |      |      |
| QnrSm-F                |                              | 5'-GCAAGTTCATTGAACAGGGT-3'     | 428  |      |
| QnrSm-R                | <i>qnrS</i>                  | 5'-TCTAAACCGTCGAGTTCGGCG-3'    |      |      |
| QnrVCm-F               |                              | 5'-GAGYTKTATGGTTTAYCCTCG-3'*   | 71   |      |
| QnrVCm-R               | <i>qnrVC</i>                 | 5'-TGTTCTGTGTGCCACGARCA-3'*    |      |      |
| <u>heavy metals</u>    |                              |                                |      |      |
| A1F                    |                              | 5'-ACCATCGGCGGCACCTGCGT-3'     | 1226 | [45] |
| A5R                    |                              | 5'-ACCATCGTCAGGTAGGGGACCAA-3'  |      |      |
| merA-F                 | <i>merA</i>                  | 5'-GTGCCGTCCAAGATCATGAT-3'     | 933  | [46] |
| merA-R                 |                              | 5'-TAGCCYACRGTSGCSACYTG-3'*    |      |      |
| czcB-I                 |                              | 5'-ATGAAAAAAAATCGCGCTT-3'      | 1200 | [47] |
| czcB-II                | <i>czcB and cusB</i>         | 5'-ATGCGCATGGGTAGCACT-3'       |      |      |
| cad1                   |                              | 5'-CAAAYTGYGCRGGHAARTTYGA-3'*  | 1058 | [48] |
| cad2                   | <i>cadA</i>                  | 5'-AACTAATGCACAAGGACA-3'       |      |      |
| pbrA-N                 |                              | 5'-ATGAGCGAATGTGGCTCGAAG-3'    | 2400 | [49] |
| pbrA-C                 | <i>pbrA</i>                  | 5'-TCATCGACGCAACAGCCTCAA-3'    |      |      |
| <u>Virulence genes</u> |                              |                                |      |      |
| toxR-F                 |                              | 5'-GTCTTCTGACGCAATCGTTG-3'     | 399  | [50] |
| toxR-R                 | <i>toxR</i>                  | 5'-ATACGAGTGGTTGCTGTCATG-3'    |      |      |
| tdh-F                  | <i>tdh</i>                   | 5'-CCAAATACATTTTACTTGG-3'      | 251  |      |

|          |                  |                            |      |      |
|----------|------------------|----------------------------|------|------|
| tdh-R    |                  | 5'-GGTACTAAATGGCTGACATC-3' |      |      |
| trh-F    |                  | 5'-GGCTCAAAATGGTTAAGCG-3'  |      |      |
| trh-R    | <i>trh</i>       | 5'-CATTTCCGCTCTCATATGC-3'  | 250  |      |
|          |                  | 5'-                        |      |      |
| VHF1     | <i>vvh</i>       | ATCATGAATAAACTATTACGTTACT  | 1300 | [25] |
|          |                  | -3'                        |      |      |
| VHR1     |                  | 5'-GAAAGGATGGTTTGACAAT-3'  |      |      |
| VP1409-F |                  | 5'-TGTTGCTTTCTATTGCGAC-3'  |      |      |
| VP1409-R | <i>T6SS</i>      | 5'-CCATAACGACTTTTCTTTC-3'  | 869  | [51] |
|          | <u>Integrase</u> |                            |      |      |
|          | <u>Class 1</u>   |                            |      |      |
| intI1F   |                  | 5'-GGCTTCGTGATGCCTGCTT-3'  |      |      |
| intI1R   | <i>intI1</i>     | 5'-CATTCCTGGCCGTGGTTCT-3'  | 146  | [52] |

\*: M = A or C; H = A or C or T; Y = C or T; K = T or G; R = A or G; S = G or C; W = A or T.

## References

36. Campana, E.H.; Xavier, D.E.; Petrolini, F.V.; Cordeiro-Moura, J.R.; Araujo, M.R.; Gales, A.C. Carbapenem-resistant and cephalosporin-susceptible: a worrisome phenotype among *Pseudomonas aeruginosa* clinical isolates in Brazil. *Braz. J. Infect. Dis.* **2017**, *21*, 57-62, doi:10.1016/j.bjid.2016.10.008
37. Schiwon, K.; Arends, K.; Rogowski, K.M.; Fürch, S.; Prescha, K.; Sakinc, T.; et al. Comparison of antibiotic resistance, biofilm formation and conjugative transfer of *Staphylococcus* and *Enterococcus* isolates from International Space Station and Antarctic Research Station Concordia. *Microb. Ecol.* **2013**, *65*, 638-651, doi:10.1007/s00248-013-0193-4
38. Park, C.H.; Robicsek, A.; Jacoby, G.A.; Sahm, D.; Hooper, D.C. Prevalence in the United States of *aac(6')-Ib-cr* encoding a ciprofloxacin-modifying enzyme. *Antimicrob. Agents Chemother.* **2006**, *50*, 3953-3955, doi:10.1128/AAC.00915-06
39. Heuer, H.; Krögerrecklenfort, E.; Wellington, E.M.H.; Egan, S.; van Elsas, J.D.; van Overbeek, L.; et al. Gentamicin resistance genes in environmental bacteria: prevalence and transfer. *FEMS Microbiol. Ecol.* **2002**, *42*, 289-302, doi:10.1111/j.1574-6941.2002.tb01019.x
40. Nonaka, L.; Maruyama, F.; Suzuki, S.; Masuda, M. Novel macrolide-resistance genes, *mef(C)* and *mph(G)*, carried by plasmids from *Vibrio* and *Photobacterium* isolated from sediment and seawater of a coastal aquaculture site. *Lett. Appl. Microbiol.* **2015**, *61*, 1-6, doi:10.1111/lam.12414
41. Jensen, L.B.; Frimodt-Møller, N.; Aarestrup, F.M. Presence of *erm* gene classes in gram-positive bacteria of animal and human origin in Denmark. *FEMS Microbiol. Lett.* **1999**, *170*, 151-158, doi:10.1111/j.1574-6968.1999.tb13368.x
42. Sutcliffe, J.; Grebe, T.; Kamradt, A.T.; Wondrack, L. Detection of erythromycin resistant determinants by PCR. *Antimicrob. Agents Chemother.* **1996**, *40*, 2562-2566, doi:10.1128/AAC.40.11.2562
43. Luna, V.A.; Cousin, S.-Jr.; Whittington, W.L.H.; Roberts, M.C. Identification of the conjugative *mef* gene in clinical *Acinetobacter junii* and *Neisseria gonorrhoeae* isolates. *Antimicrob. Agents Chemother.* **2000**, *44*, 2503-2506, doi:10.1128/aac.44.9.2503-2506.2000
44. Kraychete, G.B.; Botelho, L.A.B.; Campana, E.H.; Picão, R.C.; Bonelli, R.R. Updated multiplex PCR for detection of all six plasmid-mediated *qnr* gene families. *Antimicrob. Agents Chemother.* **2016**, *60*, 7524-7526, doi:10.1128/AAC.01447-16
45. De, J.; Ramaiah, N.; Vardanyan, L. Detoxification of toxic heavy metals by marine bacteria highly resistant to mercury. *Mar. Biotechnol. (NY)* **2008**, *10*, 471-477 doi:10.1007/s10126-008-9083-z
46. Deredjian, A.; Colino, C.; Brothier, E.; Favre-Bonté, S.; Cournoyer, B.; Nazaret, S. Antibiotic and metal resistance among hospital and outdoor strain of *Pseudomonas aeruginosa*. *Res. Microbiol.* **2011**, *162*, 689-700, doi:10.1016/j.resmic.2011.06.007
47. Khan, Z.; Nisar, M.A.; Hussain, S.Z.; Arshad, M.N.; Rehman, A. Cadmium resistance mechanism in *Escherichia coli* P4 and its potential use to bioremediate environmental cadmium. *Appl. Microbiol. Biotechnol.* **2015**, *99*, 10745-10757, doi:10.1007/s00253-015-6901-x
48. Oger, C.; Bertheb, T.; Quilleta, L.; Barraya, S.; Chiffolleau, J.F.; Petit, F. Estimation of the abundance of the cadmium resistance gene *cadA* in microbial communities in polluted estuary water. *Res. Microbiol.* **2001**, *152*, 671-678, doi:10.1016/s0923-2508(01)01246-3
49. Borremans, B.; Hobman, J.L.; Provoost, A.; Brown, N.L.; van-Der-Lelie, D. Cloning and functional analysis of the *pbr* lead resistance determinant of *Ralstonia metallidurans* CH34. *J. Bacteriol.* **2001**, *183*, 5651-5658, doi:10.1128/JB.183.19.5651-5658.2001

50. Guin, S.; Saravanan, M.; Chowdhury, G.; Pazhani, G.P.; Ramamurthy, T.; Das, S.C. Pathogenic *Vibrio parahaemolyticus* in diarrhoeal patients, fish and aquatic environments and their potential for inter-source transmission. *Heliyon* **2019**, *5*, 01743, doi:10.1016/j.heliyon.2019.e01743
51. Chao, G.; Jiao, X.; Zhou, X. et al. Distribution of genes encoding four pathogenicity islands (VPaIs), T6SS, biofilm, and type I pilus in food and clinical strains of *Vibrio parahaemolyticus* in China. *Foodborne Pathog. Dis.* **2010**, *7*, 649-658, doi:10.1089/fpd.2009.0441
52. Jiang, H.; Yu, T.; Yang, Y.; Yu, S.; Wu, J.; Lin, R.; Li, Y.; Fang, J.; Zhu, C. Co-occurrence of antibiotic and heavy metal resistance and sequence type diversity of *Vibrio parahaemolyticus* isolated from *Penaeus vannamei* at freshwater farms, seawater farms, and markets in Zhejiang Province, China. *Front. Microbiol.* **2020**, *11*, 1294, doi:10.3389/fmicb.2020.01294
